# Supplementary material
Source: publisher figshare collection journal article supplement (https://tandf.figshare.com/ndownloader/files/22068492)
Supplement: Supplementary file 1 [file 22068492]

**Supplementary Material 1. Flow chart of patient enrollment and exclusion.**

SALS, Smart Advanced Life Support; OHCA, out-of-hospital cardiac arrest; ROSC, return of spontaneous circulation.


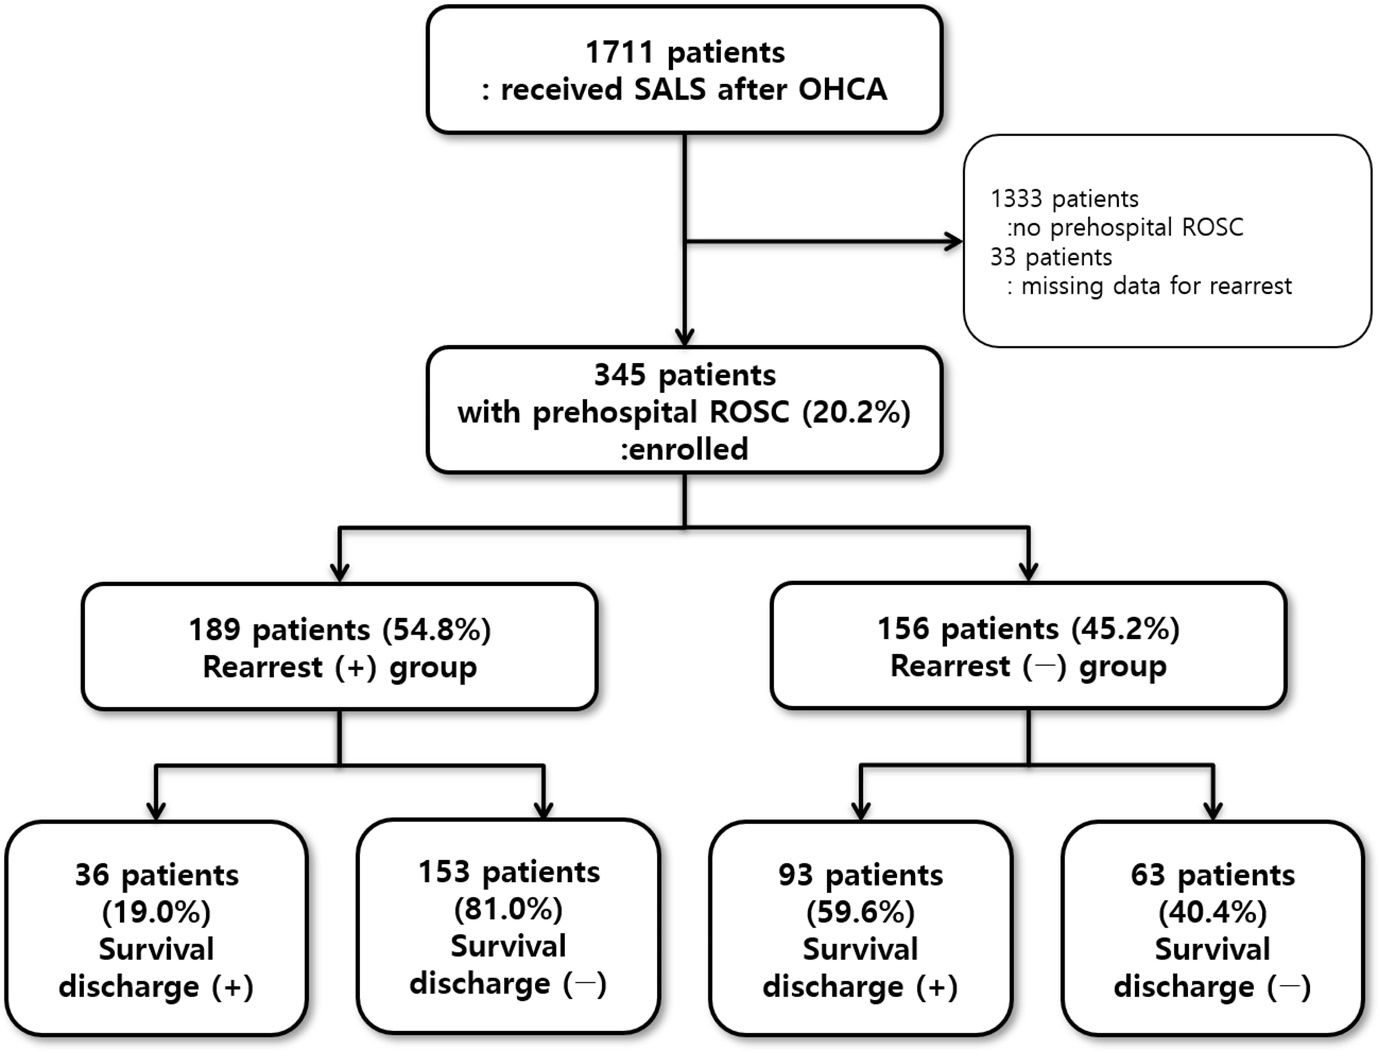


**Supplementary Material 2. Description of rearrest**

| **Variables** | **Rearrest (+)**  **group**  **n = 189** |
| --- | --- |
| Sex (male), n (%) | 139 (73.5%) |
| Age (years) | 62 (54-73) |
| Location of rearrest, n (%) |  |
| Ambulance | 83 (43.9%) |
| Field | 95 (50.3%) |
| Hospital | 1 (0.5%) |
| Unknown | 10 (5.3%) |
| Rhythm of rearrest, n (%) |  |
| VF/pulseless VT | 29 (15.3%) |
| PEA | 61 (32.3%) |
| Asystole | 33 (17.5%) |
| Unknown | 66 (34.9%) |
| Interval from first prehospital ROSC to rearrest (min) | 3.0 (2.0-6.0) |
| Frequency of rearrest |  |
| 1 | 150 (79.4%) |
| 2 | 22 (11.6%) |
| 3 | 7 (3.7%) |
| ≥4 | 2 (1.1%) |
| Unknown | 8 (4.2%) |

Values are expressed as numbers (percentages) or medians (interquartile ranges).

Abbreviations: VF, ventricular fibrillation; VT, ventricular tachycardia; PEA, pulseless electrical activity; ROSC, return of spontaneous circulation.
